# Supplementary material for: TPSC: a module detection method based on topology potential and spectral clustering in weighted networks and its application in gene co-expression module discovery
Source: Springer Nature journal article supplement (doi:10.1186/s12859-021-03964-5), 2021-10-01
Supplement: 12859_2021_3964_MOESM1_ESM.pdf [file 12859_2021_3964_MOESM1_ESM.pdf]

(a)M6

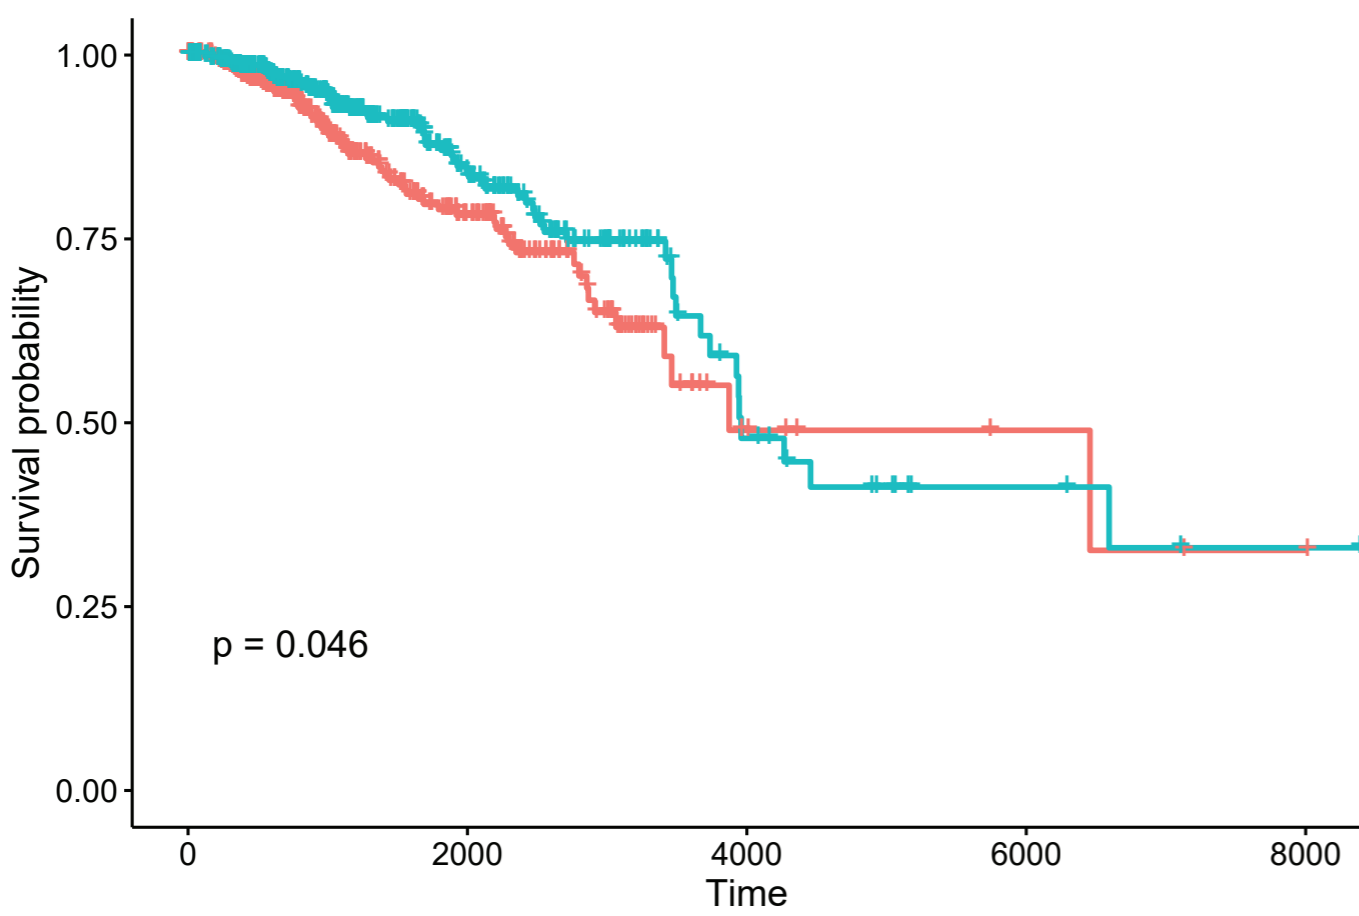

(b)M16

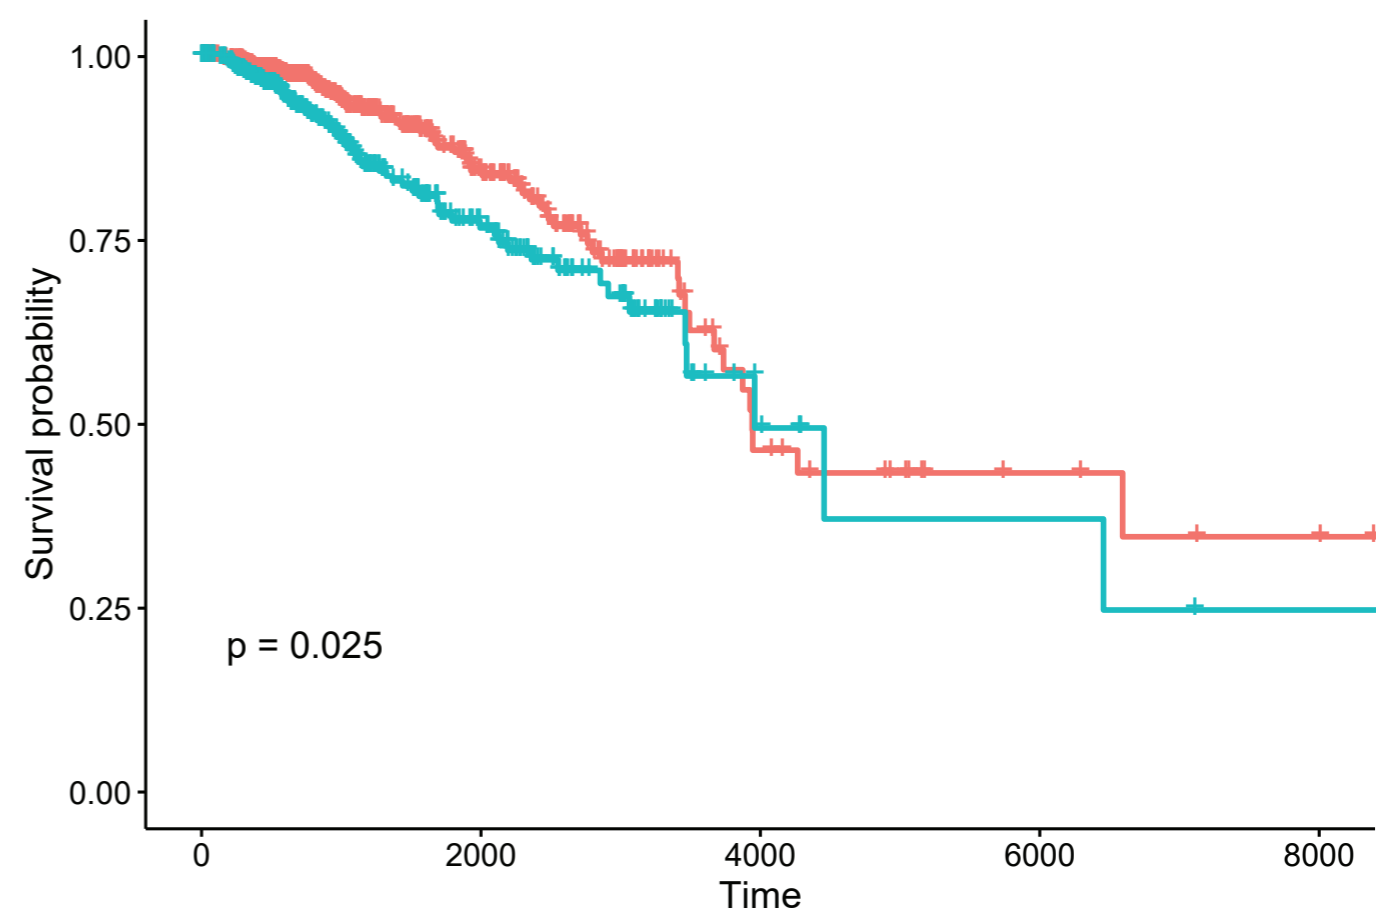

(c)G1

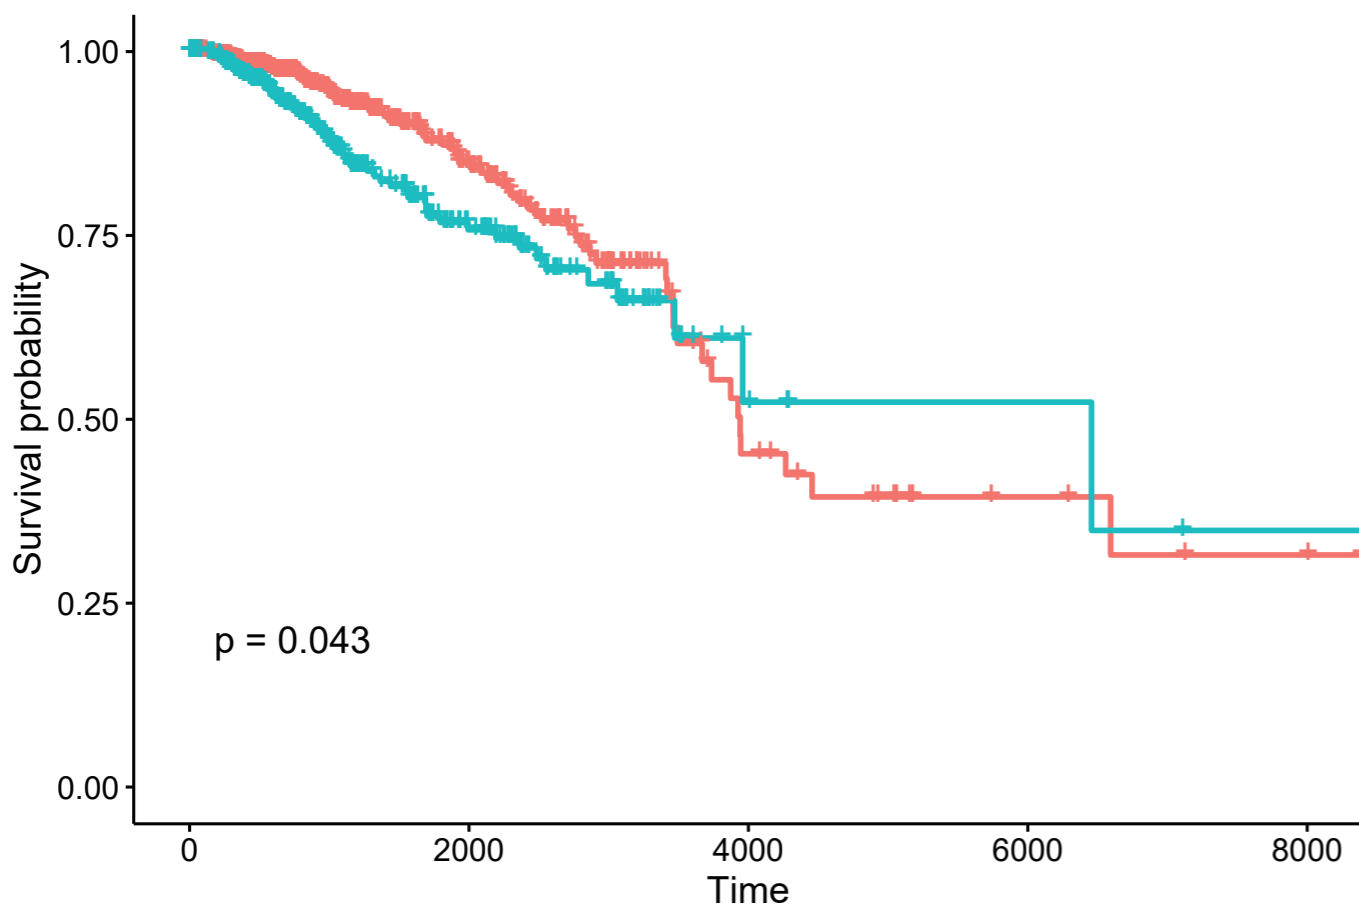

(d)G12

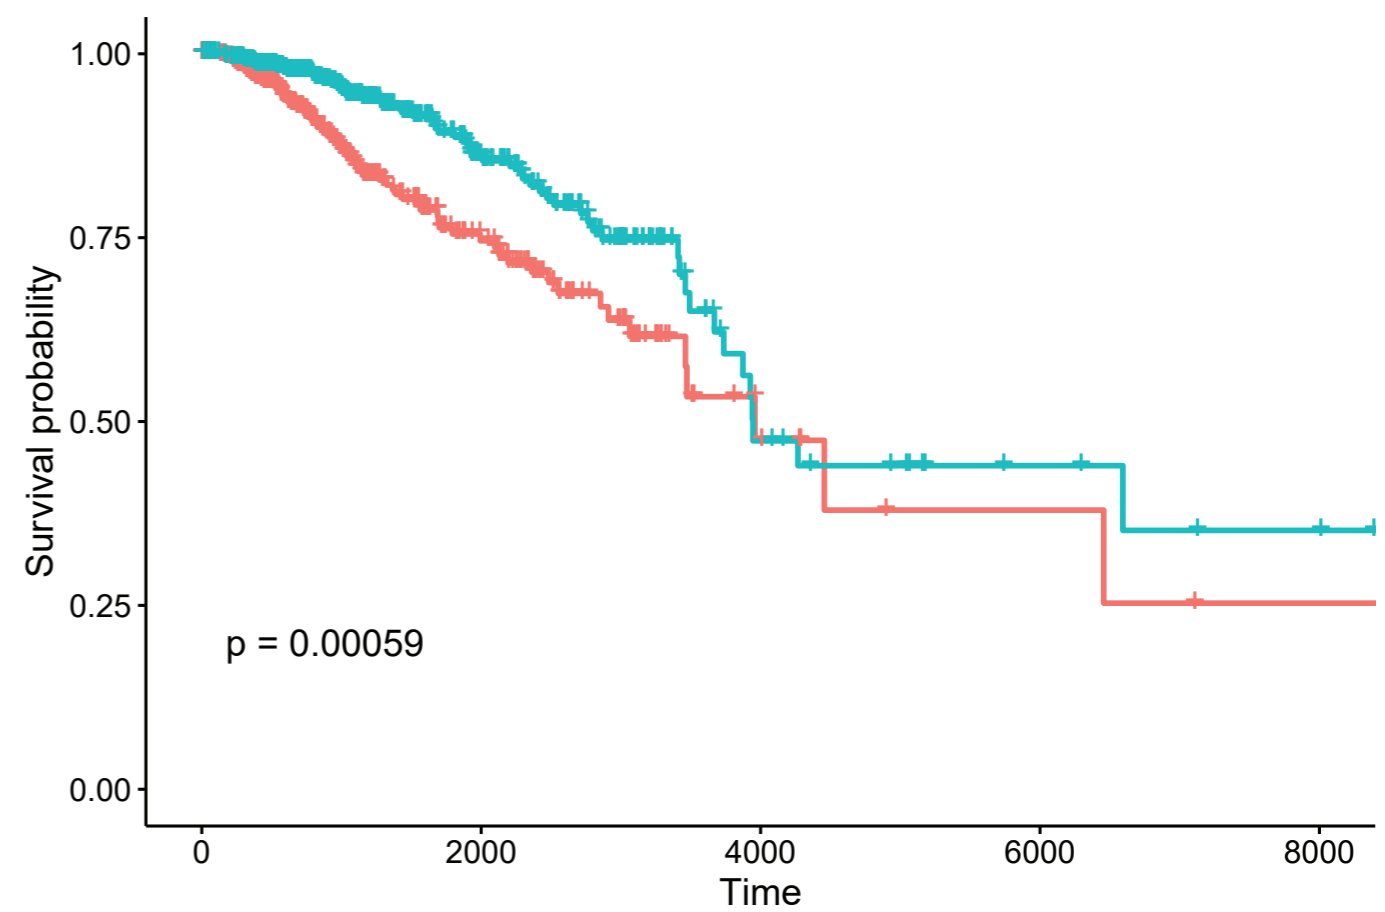

(e)W13

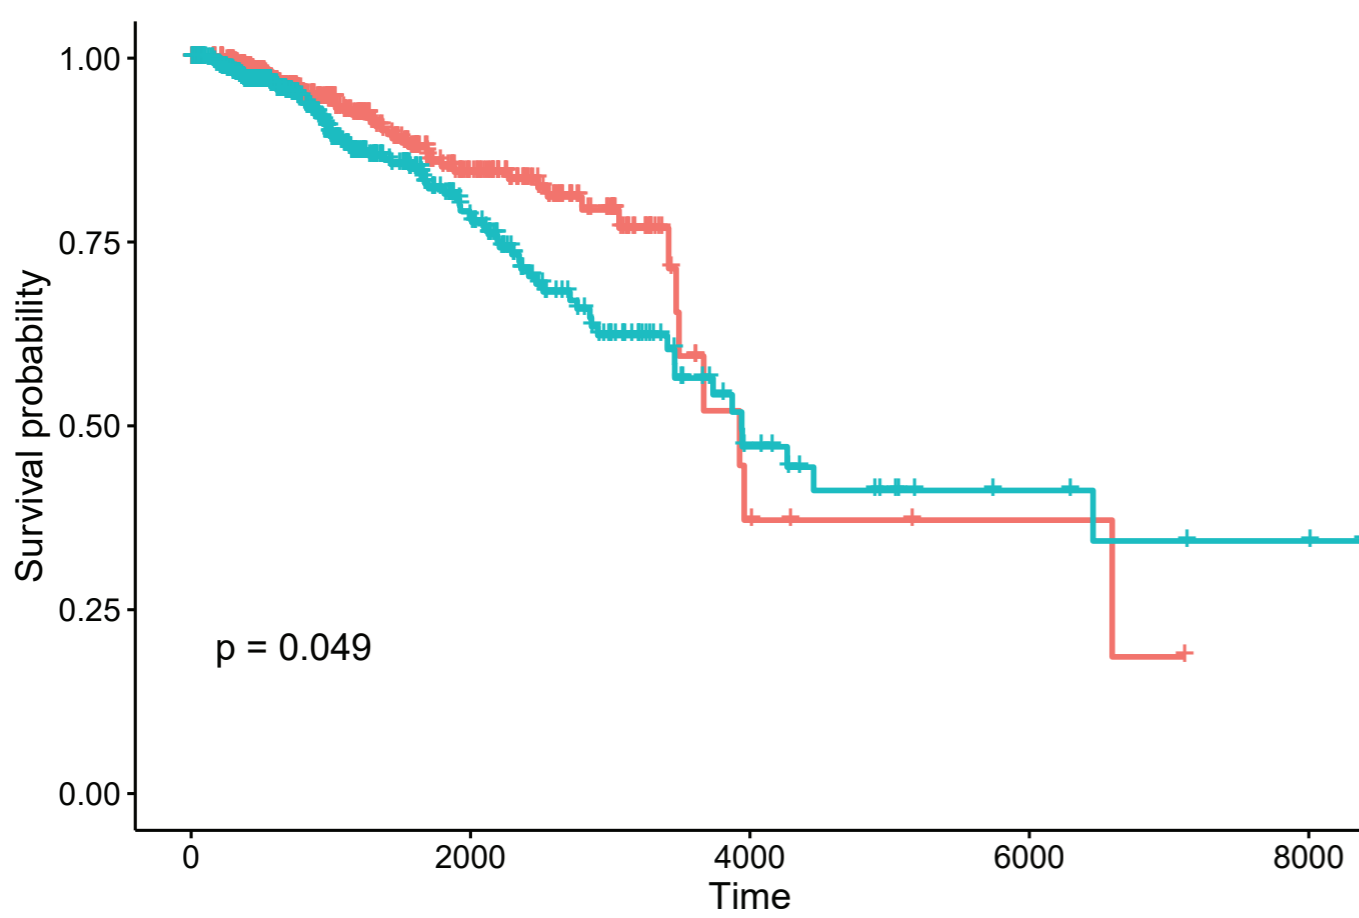

(f)Q7

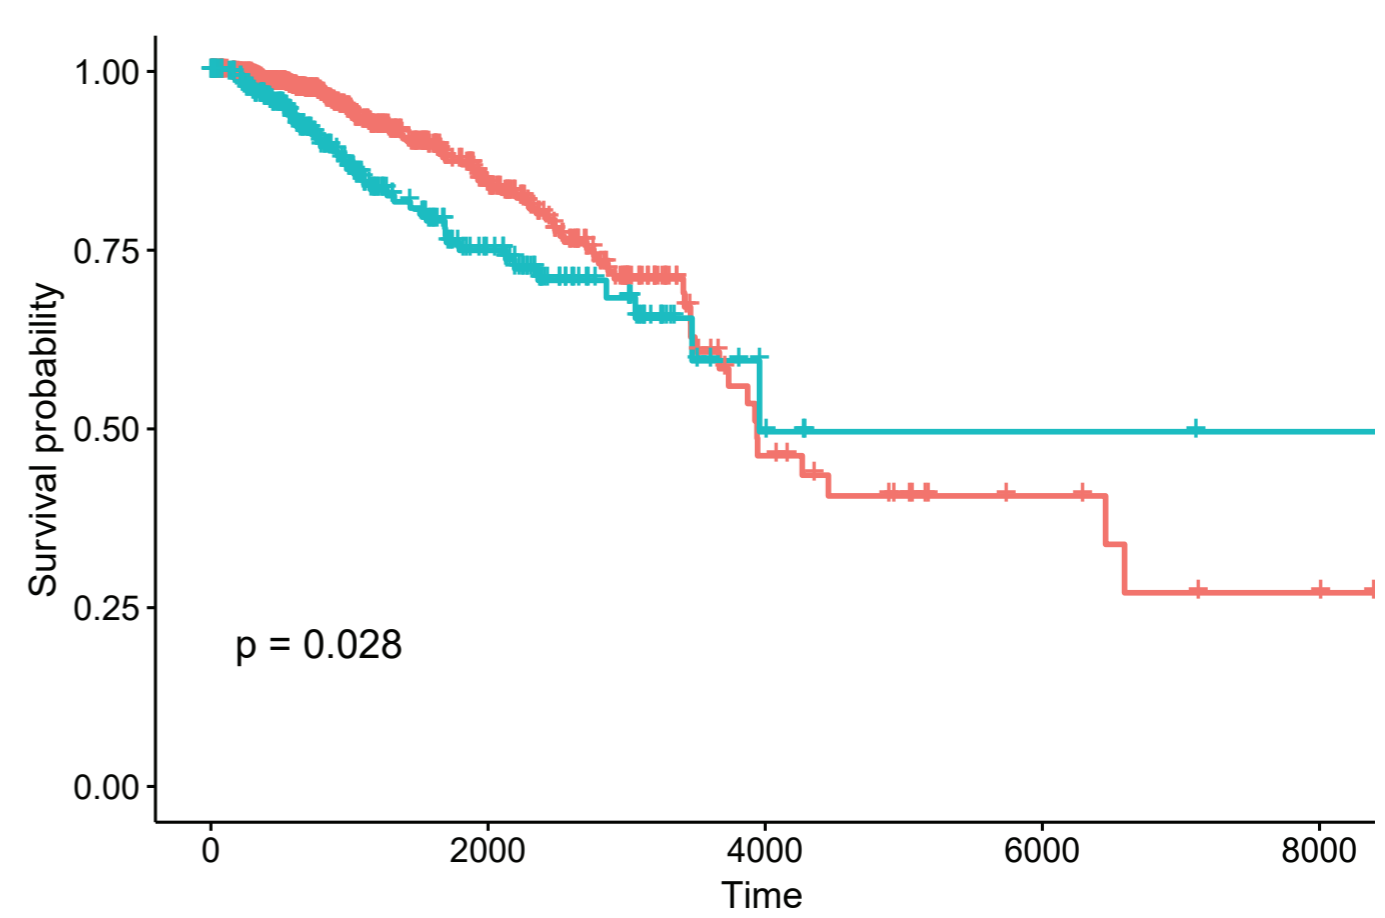

—+— Down-regulated

—+— Up-regulated
